# Supplementary material for: Serum Calretinin as a Biomarker in Malignant Mesothelioma
Source: MDPI journal article supplement (doi:10.3390/jcm10214875), 2021-10-22
Supplement: s1 [file s1]

**Table S1:** Association of clinical parameters with serum calretinin levels.

| Characteristic | Category/Unit | All subjects                       |        | No disease<br>(N=73)               |       | Pleural<br>plaques<br>(N=195)      |        | Asbestosis<br>(N=117)              |        | MM<br>(N=164)                      |       |
|----------------|---------------|------------------------------------|--------|------------------------------------|-------|------------------------------------|--------|------------------------------------|--------|------------------------------------|-------|
|                |               | Median<br>calretinin<br>(25%-75%)* | P      | Median<br>calretinin<br>(25%-75%)* | P     | Median<br>calretinin<br>(25%-75%)* | P      | Median<br>calretinin<br>(25%-75%)* | P      | Median<br>calretinin<br>(25%-75%)* | P     |
| Gender         | Male          | 0.16<br>(0.09-0.32)                | <0.001 | 0.11<br>(0.06-0.17)                | 0.042 | 0.15<br>(0.10-0.21)                | <0.001 | 0.11<br>(0.06-0.16)                | <0.001 | 0.48<br>(0.22-1.24)                | 0.315 |
|                | Female        | 0.25<br>(0.15-0.46)                |        | 0.15<br>(0.08-0.31)                |       | 0.23<br>(0.18-0.35)                |        | 0.22<br>(0.15-0.28)                |        | 0.76<br>(0.24-1.56)                |       |
| Smoking        | No            | 0.21<br>(0.12-0.42)                | <0.001 | 0.12<br>(0.07-0.26)                | 0.183 | 0.19<br>(0.14-0.28)                | 0.019  | 0.15<br>(0.09-0.23)                | 0.167  | 0.51<br>(0.25-1.33)                | 0.802 |
|                | Yes           | 0.16<br>(0.09-0.29)                |        | 0.12<br>(0.05-0.17)                |       | 0.16<br>(0.11-0.23)                |        | 0.12<br>(0.06-0.19)                |        | 0.53<br>(0.18-1.45)                |       |
|                |               | Spearman's<br>rho                  | P      | Spearman's<br>rho                  | P     | Spearman's<br>rho                  | P      | Spearman's<br>rho                  | P      | Spearman's<br>rho                  | P     |
| Age            | Years         | 0.310                              | <0.001 | 0.034                              | 0.773 | 0.132                              | 0.066  | 0.163                              | 0.079  | 0.051                              | 0.520 |

\*calretinin levels in ng/ml

MM: malignant mesothelioma

**Table S2:** Data on asbestos exposure among subjects without malignant mesothelioma, occupationally exposed to asbestos.

| Characteristic               | Category/Unit                                   | All subjects (N=385) | No disease (N=73) | Pleural plaques (N=195) | Asbestosis (N=117)  |
|------------------------------|-------------------------------------------------|----------------------|-------------------|-------------------------|---------------------|
| Asbestos exposure            | Low, N (%)                                      | 257 (67.3) [3]       | 58 (79.5)         | 140 (72.5) [2]          | 59 (50.9) [1]       |
|                              | Middle, N (%)                                   | 49 (12.8)            | 6 (8.2)           | 22 (11.4)               | 21 (18.1)           |
|                              | High, N (%)                                     | 76 (19.9)            | 9 (12.3)          | 31 (16.1)               | 36 (31.0)           |
| Cumulative asbestos exposure | Fibres/cm <sup>3</sup> -years, Median (25%-75%) | 4.7 (1.9-15.0) [3]   | 2 (0.6-5.8)       | 3.9 (1.9-11.8) [2]      | 10.3 (4.3-23.2) [1] |
| Time of asbestos exposure    | Months, Median (25%-75%)                        | 270 (148-343) [14]   | 259 (104.5-337)   | 264.5 (105-339) [13]    | 294 (204-356.5) [1] |

Number of missing data is presented in [] brackets.

**Table S3:** Association of asbestos exposure with calretinin levels among subjects without malignant mesothelioma, occupationally exposed to asbestos.

| Characteristic               | Category/Unit                 | All subjects                 |       | No disease                   |       | Pleural plaques              |       | Asbestosis                   |       |
|------------------------------|-------------------------------|------------------------------|-------|------------------------------|-------|------------------------------|-------|------------------------------|-------|
|                              |                               | Median calretinin (25%-75%)* | P     |
| Asbestos exposure            | Low                           | 0.15 (0.09-0.22)             | 0.727 | 0.12 (0.07-0.21)             | 0.381 | 0.17 (0.11-0.24)             | 0.527 | 0.13 (0.08-0.19)             | 0.688 |
|                              | Middle                        | 0.15 (0.08-0.23)             |       | 0.09 (0.04-0.12)             |       | 0.20 (0.13-0.29)             |       | 0.14 (0.04-0.19)             |       |
|                              | High                          | 0.15 (0.10-0.25)             |       | 0.08 (0.06-0.22)             |       | 0.19 (0.12-0.25)             |       | 0.13 (0.10-0.24)             |       |
|                              |                               | Spearman's rho               | P     |
| Cumulative asbestos exposure | Fibres/cm <sup>3</sup> -years | -0.025                       | 0.631 | 0.005                        | 0.966 | 0.053                        | 0.460 | 0.118                        | 0.208 |
| Time of asbestos exposure    | Months                        | 0.070                        | 0.178 | -0.143                       | 0.228 | 0.141                        | 0.057 | 0.187                        | 0.045 |

\*calretinin levels in ng/ml

**Table S4:** Association of asbestos exposure with calretinin levels among patients with malignant mesothelioma.

| Asbestos exposure | N (%)     | Calretinin level (ng/ml)<br>Median (25%-75%) | P     |
|-------------------|-----------|----------------------------------------------|-------|
| Low               | 19 (40.4) | 0.44 (0.22-2.47)                             | 0.350 |
| Middle            | 13 (27.7) | 0.37 (0.24-1.66)                             |       |
| High              | 15 (31.9) | 0.48 (0.12-1.18)                             |       |
